# Supplementary material for: Measurement of NO x and NO y with a thermal dissociation cavity ring-down spectrometer (TD-CRDS): Instrument characterisation and first deployment
Source: Copernicus journal article supplement (doi:10.5194/amt-2020-187), 2020-05-25
Supplement: Supplementary file [file amt-2020-187-AC2-supplement.pdf]

## Author's Response to Referee #2

*In this response, the referee comments (in black) are listed together with our replies (in blue) and the changes to the original manuscript (in red).*

Friedrich et al. describe a 2-channel thermal dissociation cavity ring-down spectrometer (TD-CRDS) for quantification of NO<sub>x</sub>, NO<sub>y</sub>, and particulate nitrate (pNit). Thermograms of peroxyacyl nitrate (PAN), isopropyl nitrate and nitric acid are presented. The potential interference from NH<sub>3</sub> and secondary radical chemistry is evaluated. The use of an activated carbon denuder to suppress gas-phase components of NO<sub>y</sub> and transmit pNit is described. Several experiments are presented to characterize the performance of this denuder: the transmission of ammonium nitrate particles in the 10 nm - 414 nm size range and the partial removal of several trace gases (NO, NO<sub>2</sub>, PAN, iPN, and HNO<sub>3</sub>) as a function of relative humidity (RH) which revealed inlet memory effects. Sample ambient air measurements from the 2017 AQABA campaign and ambient air measurements in Mainz, Germany are presented.

This research group has described similar instruments previously (Sobanski et al., 2016; Thieser et al., 2016) and in this paper extends the earlier measurement capabilities to now quantify NO<sub>x</sub>, NO<sub>y</sub>, and aerosol nitrate. The measurement of NO<sub>x</sub> and NO<sub>y</sub> (including NH<sub>4</sub>NO<sub>3</sub>) has previously been demonstrated by Fuchs et al. (2009) and Wild et al. (2014), so that the main novelty of this work is the use of the denuder to selectively quantify ammonium nitrate. A denuder was previously used by the Cohen group (Rollins et al., 2010) to quantify organic nitrates which dissociate at a lower inlet temperature than NH<sub>4</sub>NO<sub>3</sub>.

The measurement of NO<sub>x</sub> by CRDS through the addition of O<sub>3</sub> is convincing. However, the paper will require considerable revision before it can be considered for acceptance. I have summarized my major concerns below. Most importantly, I am not convinced that the instrument presented here yields accurate NO<sub>y</sub> and particulate nitrate data.

We thank the referee for the comprehensive and constructive comments on our paper, which we address in the following responses. We have performed additional laboratory experiments, as suggested.

### Major comments

(1) Thermograms and temperature dependence of thermal dissociation:

(a) The thermograms presented in this paper are inconsistent with literature, but no convincing rationale is provided as to why that would be. (Day et al., 2002; Wild et al., 2014) have shown that thermograms of iPN and HNO<sub>3</sub> are considerably offset from each other, which is what one would expect from their Arrhenius parameters (and is shown in the SI of this paper as Figure S2D). The "rather short" heated section of the inlet likely broadens the thermograms which is undesirable but should not have resulted in their complete overlap.

We re-measured the iPN thermogram using a thoroughly cleaned canister and with a different liquid sample. The newly measured thermogram is much closer to that expected from our own previous measurements and we conclude that the previous sample was contaminated (presumably with  $\text{HNO}_3$  as the referee suggested). Note that while this result is reassuring, it changes none of the conclusions drawn in the manuscript as the instrument is not designed to measure PN<sub>s</sub>, AN<sub>s</sub>,  $\text{HNO}_3$  etc separately, but to provide a measurement of  $\text{NO}_y$ . We now write:

A 10 L stainless-steel canister containing 10.3 ppmv of isopropyl nitrate (iPN) at a pressure of 4 bar  $\text{N}_2$  was prepared using a freshly vacuum-distilled liquid sample using standard manometric methods.  $\text{NO}_x$  impurities were  $\sim 4.7$  ppbv, though we note that diluted iPN stored in stainless-steel canisters for periods of several weeks degrades to form  $\text{NO}_2$  and  $\text{HNO}_3$ .

The thermogram is displayed in Fig. 2, the absolute concentrations in Fig. S2b). Based on the mixing ratio of iPN in the canister and the dilution flows, 10.7 ppbv represents  $(101 \pm 11)\%$  conversion. The shaded area around the expected iPN mixing ratio in Fig. S2b) signifies the uncertainty of this value, based on propagation of the errors during the manometric and dilution procedures (2% for flow rates, 5% for pressures measured with digital pressure gauges and 10% for the last dilution step using the analog pressure gauge of the canister).

Between 550 and 850 °C we observe a weak increase in  $\text{NO}_2$  from 10.7 to 11.2 ppbv, which is likely due to small amounts of  $\text{HNO}_3$  in the sample. For iPN, the temperature at 50% conversion is 50 °C higher than those reported by Thieser et al. (2016) and Sobanski et al. (2016). Wild et al. (2014) employed a gaseous mixture of different alkyl nitrates and also observed a broad thermogram, with a an initial increase in  $\text{NO}_2$  (up to 80% conversion) for temperatures < 300 °C, followed by a slower increase up to 800 °C. The alkyl nitrates thermogram of Wild et al. (2014) has been included into Fig. S2b) to illustrate this behaviour and to facilitate direct comparison.

(b) The thermogram for PAN is inconsistent with a large body of literature including work by the Mainz group (Phillips et al., 2013) which showed full dissociation of PAN at an inlet temperature of  $\sim 150$  °C (not at  $\sim 400$  °C). If the higher dissociation temperatures are a consequence of the short heater residence time, then this would be design flaw as the higher temperatures enable unwanted side reactions, increase thermal gradients, and reduce selectivity.

This instrument is not designed to be selective and separately measure PAN and AN<sub>s</sub>. It is designed to measure  $\text{NO}_y$  and the positions of the individual thermograms are not of central importance as long as the plateau region is reached. The Phillips 2013 instrument used a PFA tube wrapped with heating wire rather than a quartz tube inserted into a commercial oven and was operated at a lower flow rate. There is no reason to expect that thermograms obtained at different flows with different tube materials and diameters (and thus temperature gradients) should be similar. In order to more fully understand the source of the differences which the referee has highlighted, we have measured the gas temperature by inserting a thermocouple into the oven region. We found, for example that with the oven temperature set at 310 °C, the thermocouple reading was just 230 °C, which helps explain the shift to higher temperatures when using the present set-up. We have also assessed the impact of

thermal gradients on the thermograms in another supplementary figure (see Fig. S3c)). The following text has been added:

By inserting a thermocouple into the middle part of the heated section under normal sampling conditions we were able to show that the temperature of the gas was  $\approx 80\text{ }^{\circ}\text{C}$  lower than that indicated by the oven's internal temperature sensor in the 200-300  $^{\circ}\text{C}$  temperature range and about 40  $^{\circ}\text{C}$  lower at a set temperature of 600  $^{\circ}\text{C}$  (see Fig. S3a). We were unable to measure the temperatures of the gas stream at oven temperatures above about 600  $^{\circ}\text{C}$  and throughout the manuscript we refer only to the temperature indicated by the internal sensor of the oven.

We have added a new general section explaining why thermograms measured in different setups may differ.

### **3.1.8 Summary of thermograms**

The thermograms obtained by the present instrument deviate from others reported in the literature, the temperatures required for 50% dissociation being generally higher by e.g. 80  $^{\circ}\text{C}$  for PAN, 50  $^{\circ}\text{C}$  for iPN and 150  $^{\circ}\text{C}$  for  $\text{HNO}_3$ , respectively (Day et al., 2002; Wild et al., 2014; Sobanski et al., 2016; Thieser et al., 2016; Womack et al., 2017). This lack of agreement with other setups is not unexpected as the degree of dissociation of a trace gas at any temperature depends not only on the temperature but also on the time over which the molecule is exposed to that temperature (Womack et al., 2017). To illustrate this, based on rate coefficients (related to bond-dissociation energies, BDE) for the thermal dissociation of PAN (Bridier et al., 1991), iPN (Barker et al., 1977),  $\text{HNO}_3$  (Glänzer and Troe, 1974),  $\text{N}_2\text{O}_5$  (IUPAC, 2019),  $\text{ClNO}_2$  (Baulch et al., 1981), and HONO (Tsang and Herron, 1991), we calculated the theoretical 50% conversion temperature for each molecule as a function of residence time inside the oven (see Fig. S3b)). At short residence times the dependence on temperature is very steep (especially for large BDEs) which partially explains the differences between our short heated section inlet and longer ones. However, in practise, we know neither the precise average temperature of the gas at the centre of the oven, nor can we characterise the axial and radial gradients in temperature in the quartz tubes so that calculations of fractional dissociation (or complete thermograms) based on bond-dissociation energies are at best only a rough guide. We note that use of different flows, oven diameters and operational pressures will strongly affect heat transfer from the oven walls to the gas, so that reporting the temperature of the external oven-wall (as done here and in all reports in the literature) to some extent precludes comparison between different setups. The width of the thermograms (i.e. the temperature difference between e.g. 10% and 90% dissociation) will also depend on details of axial and radial temperature gradients in the tubing located within the oven and also in the downstream section of tubing, which represents a transition regime between oven and room temperature. The impact of temperature gradients inside the quartz tube was explored by calculating the  $\text{HNO}_3$  thermogram using an Arrhenius expression for its thermal dissociation and the gas residence time within the quartz tube. First we assumed that all  $\text{HNO}_3$  molecules experience the same temperature and then compared this to the situation in which 20% of the  $\text{HNO}_3$  molecules are 80  $^{\circ}\text{C}$  lower in, and 20% are 80  $^{\circ}\text{C}$  higher in temperatures. The resultant thermograms are displayed in Fig S3c) and indicate that the presence of temperature gradients results in an increase in the width of the thermogram from 250  $^{\circ}\text{C}$  to 350  $^{\circ}\text{C}$ .

The thermograms we report here serve only to determine the temperature needed to ensure ~~complete~~ maximum conversion of each trace gas to NO<sub>2</sub>. This is achieved in the present setup with a temperature of 850 °C. Where possible, we have verified that operation at the plateau of the thermogram resulted in quantitative conversion of the traces gases and particles studied, with one exception, NaNO<sub>3</sub> particles. We further note that, in an instrument designed only to measure NO<sub>y</sub>, there is no need to ensure separation (in temperature) of the thermograms for different classes of molecules.

(c) Have the authors independently confirmed the identity, purity and concentrations of the gases they sampled by CIMS (PAN, HNO<sub>3</sub>) or GC (iPN)? For PAN, Figure S2a shows a step after ~300 °C which may be due to the presence of an alkyl nitrate. For iPN and HNO<sub>3</sub> Figure S2 shows "expected values" based on permeation and dilution flows, though I consider these methods reliable standards.

As the referee mentions, flows of HNO<sub>3</sub> and iPN were obtained from either permeation standards or canisters with known mixing ratios. Experiments on N<sub>2</sub>O<sub>5</sub>, carried out following a suggestion of this referee (see comment below), were conducted with parallel sampling by a further TD-CRD operated in this laboratory. Experiments on PAN, ClNO<sub>2</sub> and HONO were conducted without parallel measurements by other instruments. Note that TD methods have been used in the past to calibrate e.g. PAN and ClNO<sub>2</sub> signals for a CIMS, so reversing the logic and using a CIMS to calibrate the TD instrument in this work makes little sense.

We would like to re-emphasise that our instrument is not set-up to measure different members of the NO<sub>z</sub> family but to measure NO<sub>y</sub>. An impurity e.g. of HNO<sub>3</sub> in the iPN sample (see above) will surely change the shape of the thermogram, but will not prevent conversion of all NO<sub>z</sub> to NO<sub>2</sub> and NO at the operational temperature of 850 °C. Text (section 3.1.8) has been added to emphasise this:

The thermograms we report here serve only to determine the temperature needed to ensure ~~complete~~ maximum conversion of each trace gas to NO<sub>2</sub>. This is achieved in the present setup with a temperature of 850 °C. Where possible, we have verified that operation at the plateau of the thermogram resulted in quantitative conversion of the traces gases and particles studied, with one exception, NaNO<sub>3</sub> particles. We further note that, in an instrument designed only to measure NO<sub>y</sub>, there is no need to ensure separation (in temperature) of the thermograms for different classes of molecules.

(d) The thermogram of NH<sub>4</sub>NO<sub>3</sub> should be shown.

(e) N<sub>2</sub>O<sub>5</sub>, ClNO<sub>2</sub>, and HONO are important NO<sub>y</sub> components; their thermal dissociation should have been evaluated since the claim is made that the inlet's behaviour is different from that of Wild et al. (2014).

We have performed additional laboratory experiments, and now include thermograms for NH<sub>4</sub>NO<sub>3</sub>, N<sub>2</sub>O<sub>5</sub>, ClNO<sub>2</sub> and HONO.

See new Sections 3.1.4 to 3.1.7.

(2) Denuder performance:

(a) The denuder partially transmits gases but at a rate that appears to be dependent on environmental factors such as RH (Figure 6) and possibly also ambient air temperature (not examined). The transmission of many potentially important components of NO<sub>z</sub> (e.g., N<sub>2</sub>O<sub>5</sub>, ClNO<sub>2</sub>, HONO) was not evaluated but should have been.

We have performed additional laboratory experiments with the denuder, and now include  $\text{N}_2\text{O}_5$ ,  $\text{ClNO}_2$  and  $\text{HONO}$  in Fig. 6. The removal efficiency of  $\text{N}_2\text{O}_5$  was only determined in dry air, to prevent the formation of  $\text{HNO}_3$ .  $\text{ClNO}_2$  and  $\text{HONO}$  were only tested under humid conditions, as humidity was required for their initial generation. The text has been modified:

The efficiency of removal of trace gases in the denuder under typical flow conditions (3.3 slm) was investigated for  $\text{NO}$ ,  $\text{NO}_2$ , PAN, iPN,  $\text{HONO}$ ,  $\text{N}_2\text{O}_5$ ,  $\text{ClNO}_2$  and  $\text{HNO}_3$  as representative  $\text{NO}_y$  species. The efficiency of removal of each trace gas (generally present at 5-40 ppbv) was determined by measuring its relative concentration when flowing through the denuder (pNit-channel) and when bypassing the denuder ( $\text{NO}_y$  channel). The results (Fig. 6) indicate that, in dry air, all of these trace gases were removed with an efficiency of close to 100%. However, when the main dilution flow was humidified significant, RH-dependent breakthrough of  $\text{NO}$  was observed, with only 60% stripped from the gas-phase at RH close to 100%.  $\text{HONO}$  was removed with 85% efficiency at an RH of 46%, and  $\text{ClNO}_2$  with 75% efficiency at an RH of 60%. In contrast, humidification had only a marginal effect on the scrubbing efficiency for  $\text{NO}_2$ , iPN and  $\text{HNO}_3$  for which an efficiency of  $\geq 95\%$  was observed. The precise values from which the removal efficiencies in Fig. 6 were determined are listed in Table S2.

(b) Memory effects. The high-concentration experiments described on pg 13 are a poor way of assessing memory effects because there could be a limited number of surface sites that are overloaded when sampling a high concentration. A more realistic experiment would be to sample a low concentration of  $\text{NO}_x$  for a longer time period, and then examine what comes off the denuder while sampling zero air.

We do not aim to provide a quantitative analysis of memory effects but to indicate that such effects can be important for this denuder type. We also have data in which the denuder was exposed to “typical” concentrations of  $\text{NO}_x$  for long periods but under less controlled (i.e. more variable conditions). The qualitative result, a release of  $\text{NO}_x$  when exposed to humidity, is the same. We now write:

Qualitatively similar results, i.e. humidity induced formation and release of  $\text{NO}_x$  from the denuder, were observed when the denuder was exposed for periods of weeks to variable levels of  $\text{NO}_x$  (i.e. up to 20 ppbv) under dry conditions.

(c)  $\text{NO}_x$  and the aforementioned components of  $\text{NO}_z$  usually dominate  $\text{NO}_y$ , such that any transmission of these species constitutes a sizeable measurement error for pNit. This should have been taken into account in an explicit error analysis as part of the pNit data reduction.

After identifying the humidity issues of the denuder and in the absence of effective regeneration techniques, we refrained from detailed analysis (including assessment of errors) in our pNit measurements. Our findings, that the denuder suffers from humidity related breakthrough and release of reactive nitrogen indicates that measurements of pNit using similar denuders to remove gaseous  $\text{NO}_y$  may suffer from bias under some conditions. We are unable to quantify this. In the ambient measurements from Mainz we measured only total  $\text{NO}_y$  and did not attempt to separate between gas and particulate phase  $\text{NO}_y$ . The pNit measurements from AQABA serve to demonstrate the presence of humidity issues under campaign conditions and were not included as part of an analysis of gas-particle nitrogen partitioning. We write:

This strongly suggests that the large difference between pNit reported by the TD-CRDS and the AMS does not result from the inability of the AMS to detect supermicron particulate nitrate, but from denuder artefacts similar to those seen in the laboratory experiments described in Sect. 3.3.2. This short case-study serves to highlight the



potential positive bias in denuder based, TD-CRDS measurements of pNit under humid field conditions.

(3) Aerosol nitrate can be present on mineral dust as organic nitrates or on sea salt aerosol. Do other nitrate salts convert to NO<sub>2</sub> in this inlet?

We have performed extra experiments on NaNO<sub>3</sub> and compared the detection efficiency of NaNO<sub>3</sub> with that of NH<sub>4</sub>NO<sub>3</sub> as a function of particle diameter.

The results are presented and discussed in the new section 3.1.7

(4) How does the instrument perform above the 1-micron size range? The latter dominates aerosol mass in many regions.

As we did not carry out experiments with super-micron particles, we can only assess this using the predicted transmission of the denuder according to the PLC. The following paragraph has been added in Sect. 3.3.1:

The PLC does a better job in predicting a reduction in transmission for the largest particles which we measured and indicates a transmission of 74% at 1 µm and 45% at 2 µm. In certain environments, nitrate associated with coarse mode particles represents a potential (negative) bias to TD-CRDS measurements of NO<sub>y</sub>.

(5) Ambient air measurements of pNit:

(a) How was the error due to break-through of NO<sub>x</sub> considered?

(b) How were denuder memory effects taken into account in the reduction of the field data?

(c) The RH dependence of denuder performance is a considerable issue considering the inlet is periodically flooded with dry zero air and then re-exposed to humid ambient air. How does this back-and-forth affect the field data?

See response to major comment (2) (c). We do not show pNit data sets that were corrected for the break-through and that can be considered as accurate pNit measurements. The denuder is never back-flooded with (hot) zero air, as this would melt the PFA fittings between denuder and quartz tube.

(d) How long was the inlet for the NO<sub>y</sub> channel? Was conductive tubing used (or were aerosol lost on the inlet)?

During AQABA, sampling was directly through the denuder in the pNit channel and through the heated quartz inlet in the NO<sub>y</sub> channel, so that aerosol losses to non-conductive tubing or bent inlet lines was avoided. In the Mainz ambient measurements, the pNit channel was not operated and the NO<sub>x</sub> and NO<sub>y</sub> channels sampled from a common overflow in a straight ca. 1 m long ½ inch PFA tube. Aerosol loss in the NO<sub>y</sub> channel might be possible under this setup. We added in Sect. 4.2:

Aerosol transmission was probably < 100% in these measurements.

(e) Since the TD-CRDS data were not compared with an independent measurement of NO<sub>y</sub> (Mo converter CL) or of total aerosol nitrate (High-volume impactors, PILS, MARGA or similar), the claim that this instrument accurately quantifies NO<sub>y</sub> and particulate nitrate in ambient air is not substantiated and the conclusions need to be weakened accordingly.

In the conclusions we now write:

Our laboratory experiments suggest that the different gas-phase NO<sub>z</sub> species investigated (PAN, iPN, N<sub>2</sub>O<sub>5</sub>, HONO, ClNO<sub>2</sub>, HNO<sub>3</sub>) are converted with near stoichiometric efficiency to NO<sub>x</sub> at an oven temperature of 850 °C. NH<sub>4</sub>NO<sub>3</sub> particles of diameter 200 nm are also detected quantitatively as NO<sub>x</sub>, whereas the efficiency of

detection of  $\text{NaNO}_3$  particles of similar diameter was closer to 25%. The efficiency of detection of coarse mode particles will be further reduced by their lower transmission through the denuder.

(6) The authors show several pages on the interference due to gas-phase  $\text{NH}_3$  only to conclude it to be insignificant. However, much more  $\text{NH}_3$  is typically present in the form of aerosol ammonium, which would evaporate in the  $\text{NO}_y$  inlet. The authors should also consider and examine conversion of  $(\text{NH}_4)_2\text{SO}_4$  especially in the presence of  $\text{O}_3$ . The concentration of  $\text{NH}_3$  which we used (131 ppb) corresponds to an aerosol ammonium loading of about  $100 \text{ microg m}^{-3}$ , which is more than found in most environments. As there is no obvious reason why  $\text{NH}_3$  from  $(\text{NH}_4)_2\text{SO}_4$  should behave differently to gas phase  $\text{NH}_3$ . We do not see any value in performing experiments on  $(\text{NH}_4)_2\text{SO}_4$ .

(7) General organization:

(a) The introduction with its lengthy discussion of nitrogen oxide chemistry misses the mark (see detailed comment below).

We would argue that some description of  $\text{NO}_y$  chemistry is essential to put this work in context and describe our motivation for the development of the instrument. Too much is probably better than too little and the well informed reader has the choice of simply skipping this section. See specific comment below for changes made.

(b) A critical comparison of the performance of this new instrument to existing methods (in terms of detection limits, selectivity, instrument including heater designs, etc.) is lacking and should be provided.

We have added an additional section (3.4) in which we compare the instrument to others. Note that we restrict this discussion to instruments that measure  $\text{NO}_x$  and  $\text{NO}_y$  and not single components thereof.

Specific comments

pg 1 line 10 "detection" replace with quantification

"detection" has been replaced with "measurement"

pg 1 line 14 "detection limits" Please state the level of confidence. Why does the  $\text{NO}_y$  channel have half of the LOD of the  $\text{NO}_x$  channel?

Our detection limits were based on instrument performance during the AQABA campaign in which the ship's motion degraded optical alignment and resulted in great variability in the zeros. We now report the LOD of both channels during operation in the laboratory, which is comparable to any stable platform.

**Abstract:** Detection limits, defined as the  $2\sigma$  precision for 1 minute averaging, are 40 pptv for both  $\text{NO}_x$  and  $\text{NO}_y$ .

**Sect. 2.2:** The  $\text{NO}_x$  detection limit of 40 pptv ( $2\sigma$ , 1 minute average) for the present instrument (laboratory conditions) was derived from an Allan variance analysis and is worse than that reported by Thieser et al. (2016) (6 pptv at 40 s) due to degradation of the mirror reflectivity.

**Sect. 3.4:** Our present detection limit for both  $\text{NO}_x$  and  $\text{NO}_y$  is however worse than that reported (for  $\text{NO}_2$ ) for the same instrument in 2016 (Thieser et al., 2016), which is a result of mirror degradation since that study.

pg 1 line 17, 18, 19 "significant interferences", "high particle transmission", "essentially complete removal" Please be quantitative.

## Corrected

[...] and rule out significant interferences from  $\text{NH}_3$  detection (< 2%) or radical recombination reactions under ambient conditions. While fulfilling the requirement of high particle transmission (> 80% between 30 and 400 nm) and essentially complete removal of reactive nitrogen under dry conditions (> 99%), [...]

pg 1 line 19 "denuder suffered from  $\text{NO}_x$  breakthrough" Does the breakthrough of  $\text{NO}_x$  not imply that the pNit measurement is inaccurate and does not work?

The breakthrough certainly indicates a potential bias. See replies to major comments (2) (c) and (5) (c). In the abstract we write:

The denuder suffered from  $\text{NO}_x$  breakthrough and memory effects (i.e. release of stored  $\text{NO}_y$ ) under humid conditions, which may potentially bias measurements of particle nitrate.

pg 1 line 21-22 " $\text{NO}_x$  measurements obtained from a ship sailing through the Red Sea, Indian Ocean and Arabian Gulf .... were in excellent agreement with those taken by a chemiluminescence detector of NO and  $\text{NO}_2$ ." What about the  $\text{NO}_y$  and pNit data during this cruise?

The oven of the pNit channel broke down shortly after the time frame shown in Sect. 4.1. An analysis of the  $\text{NO}_y$  data set will be presented in a separate publication.

pg 1 line 23 "A dataset exploring variations in the  $\text{NO}_z$  to  $\text{NO}_y$  ratio (maximum value of 0.6) of air in a region (Mainz, Germany) with strong urban influence was measured over a one-week period in winter." and what was the conclusion?

We now write:

Summertime  $\text{NO}_x$  measurements obtained from a ship sailing through the Red Sea, Indian Ocean and Arabian Gulf ( $\text{NO}_x$  levels from < 20 pptv to 25 ppbv) were in excellent agreement with those taken by a chemiluminescence detector of NO and  $\text{NO}_2$ . A dataset obtained locally under vastly different conditions (urban location in winter) revealed large diel variations in the  $\text{NO}_z$  to  $\text{NO}_y$  ratio which could be attributed to the impact of local emissions by road-traffic.

pg 2 line 1 - pg 3 line 21 Section 1.1 "Atmospheric  $\text{NO}_x$  and  $\text{NO}_y$ ". This paper is about a new instrument. The lengthy description of  $\text{NO}_x$  and  $\text{NO}_y$  chemistry and all those reactions (in particular R6-R10) are not needed and could / should be replaced by citations to the authors' own papers.

If this section stays, please fix R8. RH is already used as relative humidity and implies a saturated alkane, with which  $\text{NO}_3$  barely reacts and usually does not form an alkyl nitrate.

See reply to major comment (7) (a). We replaced "RH" with a generic alkene.

pg 4 line 17 "Pyrolysis". Thermolysis or thermal dissociation are more appropriate here. Changed throughout the manuscript.

pg 4 line 25. "which overcome these limitations" Please be more specific here. One of the limitations discussed in the preceding paragraph mentions secondary chemistry by O-atoms formed from the decomposition of ozone, which wasn't addressed in this paper.

More detail has been added:

Compared to the setups described by Thieser et al. (2016) the following changes were implemented: (1) Addition of  $\text{O}_3$  for  $\text{NO}_x$  detection; (2) higher oven temperature (to



detect HNO<sub>3</sub>) and location directly at the front of the inlet; and (3) use of a charcoal denuder for separate measurement of pNit and gas-phase NO<sub>z</sub>. The addition of O<sub>3</sub> (after the TD-inlet) ensures that we detect NO as well as NO<sub>2</sub> and thus removes bias caused e.g. by the pyrolysis of O<sub>3</sub> and reactions of O(<sup>3</sup>P) which reduce NO<sub>2</sub> to NO.

Since some of the co-authors have described multi-channel TD-CRDS instruments previously (Sobanski et al., 2016; Thieser et al., 2016), please add a short statement explaining how this new instrument differs from the old ones and what parts constitutes novelty (use of a denuder to quantify pNit).

Text has been added:

Compared to the setups described by Thieser et al. (2016) the following changes were implemented: (1) Addition of O<sub>3</sub> for NO<sub>x</sub> detection; (2) higher oven temperature (to detect HNO<sub>3</sub>) and location directly at the front of the inlet; and (3) use of a charcoal denuder for separate measurement of pNit and gas-phase NO<sub>z</sub>.

pg 5 Section 2.1 "CRDS Operation Principals" How much of this section is duplication of (Sobanski et al., 2016; Thieser et al., 2016)? Please condense and focus on what has been changed since the earlier versions, and why.

Apart from the core optical NO<sub>2</sub> detection most key parameters were changed compared to the setup described by Thieser et al. which did not measure NO<sub>γ</sub>.

pg 5 line 5 spell out / define STD

Corrected.

pg 5 line 21 Please give an uncertainty for l/d.

Corrected.

$l/d = 0.98 \pm 0.01$

pg 5 line 23 "aerosol particles" should simply be particles.

Corrected.

Does a 2 μm pore size filter truly removes all particles? In our experience, they do not, but they remove the size range that would interfere optically. Consider rephrasing.

We performed a quick check with laboratory air and a CPC and added the results:

The filter's efficiency, tested with laboratory air containing  $1.8 \times 10^3$  particles cm<sup>-3</sup> and a CPC (TSI 3025 A), was > 98%.

pg 5 line 27 "depending on flow, pressure and inlet set-up" State typical pressures and flows. Is the inlet described anywhere? Please call out the relevant section if it is.

Text added.

(see sections 2.2 and 2.3).

pg 5 line 29 300 pptv NO<sub>2</sub> equivalent and 6.5 Torr pressure difference seem like a lot. It seems to be caused by the peculiar addition point of the zero air between the valve/denuder/inlet converter and CRDS cells and probably could be avoided altogether if zero air were added at the tip of the inlet (with larger fittings). Please provide a rationale why zero air was added this way (state advantages and disadvantages).

The current set-up was implemented for a chamber study, where flowing hot air into the chamber was undesired. The pressure effect on NO<sub>2</sub> detection is well characterised and the correction worked consistently in all field and laboratory situations. We have

also zeroed by overflowing zero-air through the heated inlet (without denuder) and this option is now mentioned.

We have also used an alternative setup, in which the inlet is overflowed with zero air added close to the tip of the inlet (downstream of the oven) reduces the pressure difference, but has the disadvantage that hot air is blown out of the instrument when zeroing, which may interfere with co-located inlets. Addition of zero air upstream of the quartz inlets would remove this problem but increase the complexity of the inlet and potentially result in loss of sticky molecules such as  $\text{HNO}_3$ .

pg 6 line 9. "The maximum concentration of  $\text{NO}_2$  (and thus optimal conversion of  $\text{NO}$  to  $\text{NO}_2$ )". Please state what fraction of  $\text{NO}$  that is converted and if the  $\text{NO}$  data were corrected accordingly.

We have added the conversion factor. No correction was performed:

The maximum concentration of  $\text{NO}_2$  (corresponding to 96% of the  $\text{NO}$  in the gas bottle) was observed when the flow over the pen-ray lamp was between 60 and 80 sccm, which resulted in 19 ppmv  $\text{O}_3$  in the reaction volumes.

pg 6 Section 2.3 How is temperature measured in these furnaces? Is the oven temperature identical to the temperature of the gas travelling through it?

The temperature is measured in the ceramic block that accommodates the quartz tube. See also the reply to major comment (1) (b) and the new Figure S3a).

sections 2.3 and 2.4. A critical parameter is the sample flow rate, which should be stated here.

Has been added:

The sampling flow through both heated inlets is 3.0 slm.

pg 6 line 20. How short is "short"?

An experiment of the inlet setups during the two field campaigns should be provided.

On AQABA sampling occurred directly through the denuder in the pNit channel and through the heated quartz inlet in the  $\text{NO}_y$  channel. During the ambient measurements in Mainz, the  $\text{NO}_x$  and  $\text{NO}_y$  channels sampled from a common overflow in a straight, 1 m long ½ inch OD PFA tube (as described in Sect. 4.1 and 4.2). Inlet lines, filter location and the pressure reduction were identical in both campaigns.

[...] was kept short (ca. 30 cm) [...]

pg 6 line 22. Describe the valve (make & size etc.). Are there memory effects? Pressure drops?

A description has been added:

An electronic, PTFE 3-way valve (*Neptune Research, Inc.*, type 648T032, orifice diameter 4 mm) under software control switches between the two heated inlets, one of which is equipped with a denuder. Memory effects for  $\text{NO}_2$  on the valve surfaces were not observed. Bypassing the valve under normal sampling conditions led to an 0.6 Torr pressure change.

pg 7 line 11 "Results and discussion, 3.1 The fractional conversion of  $\text{NO}_z$  to  $\text{NO}_2$  in the TD-inlets was investigated in a series of experiments in which constant flows of (separately) PAN, isopropyl nitrate and nitric acid were passed through the heated-inlet (bypassing the denuder) while the temperature was varied and  $\text{NO}_2$  was monitored"

This section describes how the experiment was conducted and should be moved to the experimental section, and not appear under "Results and discussion"

We restricted the experimental section to basic features of the instrument that apply to all laboratory and field experiments. For better readability of the paper we prefer to add short (section specific) experimental details in the results section.

pg 7 line 20. ~400 °C to dissociate PAN is very high. How and where exactly is this temperature measured? What is the difference between the measured temperature and the temperature of the gas stream?

The temperature is measured in a ceramic block that accommodates the quartz tube. See also the reply to major comment (1) (b) and the new Figure S3a).

pg 7 line 22 "We conclude that PAN is stoichiometrically converted to NO<sub>2</sub>" Just because the curve has flattened does not imply stoichiometric conversion. Has this statement been verified, e.g., by comparison to a CL NO<sub>y</sub> instrument or PAN-CIMS?

Both CL NO<sub>y</sub> instruments and PAN-CIMS also require calibration. For PAN-CIMS, this has previously been done using TD-instruments operating in the plateau range. It makes little sense to reverse the logic and use the PAN-CIMS to calibrate the TD-CRD.

pg 7 line 24 it is also higher than Day et al. (2002), Paul et al. (2010), Di Carlo et al. (2013) and Sadanaga et al. (2016) and inconsistent with CIMS inlet performance (Slusher et al., 2004; Zheng et al., 2011; Mielke and Osthoff, 2012; Phillips et al., 2013).

There is no reason to expect identical thermograms when comparing different experimental set ups with different oven-types, tubes diameters pressures and flows. Figure S3a) shows that the offset between the oven temperature readout and the approximate thermocouple measured temperature in the center of the gas stream is largest at lower temperatures (84 °C at 230 °C). This would contribute to explain the particularly large "apparent" difference in temperature needed to thermally dissociate PAN in the present study. In addition, we emphasise that our goal is not to measure PANs, ANs etc separately. This instrument was designed to measure NO<sub>y</sub> and overlap of the "broad" thermograms is of no consequence.

pg 7 sections "3.1.1. PAN" and 3.1.2 "Isopropyl nitrate". Please comment on the possibility that the PAN and iPN sources contain impurities. PAN, for instance, will slowly decompose and form nitric acid and an alkyl nitrate.

We have remeasured the iPN thermogram with a new sample. The previously used iPN sample apparently contained a large HNO<sub>3</sub> impurity. See major comment (1) (a).

pg 7/8 "3.1.2 Isopropyl nitrate" and "3.1.3" I am skeptical about the accuracy of these thermograms. The overlap of iPN and HNO<sub>3</sub> is inconsistent with literature.

See major comment (1) (a).

pg 8 line 3 "expected" Expected how?

We now write.

Based on the mixing ratio of iPN in the canister and the dilution flows, 10.7 ppbv represents (101 ± 11)% conversion.

pg 8 line 20. Please also compare with Di Carlo et al. (2013).

Reference to Di Carlo (2013) has been made.

pg 8 lines 22-25. If the temperatures are truly that inaccurate, please consider at least rough-calibrating the temperature scale.

As shown in Fig. S3a), the temperature measurement of the oven is clearly inaccurate. However, we do not have experimental means to accurately determine the temperature distribution at 850 °C set point over the whole length and width of the oven tube and therefore prefer to continue working with the nominal set point temperatures. We emphasize that almost all of the experiments that report thermograms rely on temperature measurement at the external surface of the inlet and not in the gas-phase.

pg 8 line 26. "Rather short" Why so short? In such a short inlet, the gas stream is likely heated very unevenly, leading to considerable broadening of the TD profiles. Was this intentional, or is this a design flaw? Note the broadening would not explain the overlap of iPN and HNO<sub>3</sub> thermograms.

See new Sect. 3.4.

pg 8 line 29 if this calculation can be performed for 50% conversion, it can also be done for 10%, 20%, 30%, etc. to construct an expected TD profile, which in all likelihood will be inconsistent with Figure 2.

50 % conversion is the metric we also used to compare with literature thermograms. The overlap of iPN and HNO<sub>3</sub> has been resolved, the width of the dissociation steps due to the short residence times has been discussed above.

pg 8 line 32 "to ensure complete conversion of each trace gas to NO<sub>2</sub>". Replace complete with maximum conversion.

Corrected.

pg 9 line 4 "verify quantitative ... conversion to NO<sub>2</sub>". Quantitative conversion was not demonstrated in this work; In fact, Figure S2 suggests incomplete conversion (~85%; or 13/15 for HNO<sub>3</sub>).

See answer to major comment (1) (c). We write:

The HNO<sub>3</sub> thermogram (Fig. 2 and Fig. S2c)) has a plateau at temperatures above  $\approx 800$  °C. In the plateau region of Fig. 2, the HNO<sub>3</sub> mixing ratio measured is  $13.0 \pm 0.8$  ppb, which (within combined uncertainties) is in agreement with the expected value ( $15.2 \pm 1.98$  ppb) calculated from the permeation rate and uncertainty in the dilution factor.

pg 9 line 6. Section "3.1.4 NH<sub>3</sub>" Womack et al. (2017) showed NH<sub>3</sub> to be non-issue under most conditions, which is the same conclusion reached here. Does this insignificant interference really warrant two full pages? Consider condensing.

We would prefer to keep this section as it is. The interference is suppressed in the ambient air samples which both Womack et al. (2017) and we used. However, as discussed in the paper, there might be ambient conditions under which it becomes significant. In addition to the findings of Womack et al. (2017) and Wild et al. (2014) we showed a strong linear relationship between the NH<sub>3</sub> interference and O<sub>3</sub> added, quenched the signal with individual organic species, and confirmed the influence of RH on the quenching in both artificial and ambient atmospheres.

If NH<sub>3</sub> can be converted to NO<sub>x</sub>, what happens when NH<sub>4</sub>NO<sub>3</sub> or (NH<sub>4</sub>)<sub>2</sub>SO<sub>4</sub> aerosol are sampled?

See reply to major comment (6).

pg 9 line 22 "addition of 30 ppbv isoprene to zero-air did not significantly reduce the NH<sub>3</sub>-to-NO<sub>2</sub> conversion efficiency under dry conditions, but reduced it by a factor of two when the RH was increased to 50%" In the preceding section, it was shown that NH<sub>3</sub> converts when there is a lot of O<sub>3</sub> present; please clarify if isoprene was added in the absence or presence of O<sub>3</sub> (with which it would react)?

O<sub>3</sub> was added in all experiments on the quenching of the NH<sub>3</sub> interference, as the interference is barely detectable without O<sub>3</sub>, as seen in the pure NH<sub>3</sub> thermogram. A note about the O<sub>3</sub> concentration was added:

We found that addition of 30 ppbv isoprene to zero-air (containing 330 ppbv O<sub>3</sub>) did not significantly reduce the NH<sub>3</sub>-to-NO<sub>2</sub> conversion efficiency under dry conditions, but reduced it by a factor of two when the RH was increased to 50%.

pg 11 R22. How much CH<sub>3</sub>C(O)O<sub>2</sub>NO<sub>2</sub> are expected in a heated inlet? Its dissociation reaction is missing.

The dissociation reaction has been added as R22a.

We also explored the potential for bias caused by the recombination of CH<sub>3</sub>C(O)O<sub>2</sub> and NO<sub>2</sub> ~~when measuring PAN~~ (reaction R22b), following the thermal decomposition of PAN (reaction R22a).

pg 11 equation (2). Is this equation valid for the likely turbulent flow conditions in the inlet?

The calculation of the diffusion coefficient is not coupled to flow conditions. Equation 3 applies to laminar flows. Under turbulent conditions transfer to the walls is likely to be more rapid.

pg 12 line 24/26 "Particle loss calculator (PCL)" Should this be PLC?

Corrected

pg 12 line 26 "which was developed for cylindrical piping and not the square honeycomb shape of the denuder and also does not take into account losses due to impact at the finite surface area which the gas/particle flow is exposed to at the entrance to the honeycomb" Based on this statement, wouldn't it be reasonable to conclude that this calculator should not be used?

The PLC gives a rough guide and indicates that significant particle loss is likely to occur for super-micron particles. We write:

The PLC does a better job in predicting a reduction in transmission for the largest particles which we measured and indicates a transmission of 74% at 1 μm and 45% at 2 μm. In certain environments, nitrate associated with coarse mode particles represents a potential (negative) bias for TD-CRDS measurements of NO<sub>y</sub>.

pg 13 line 6. "close to 100%". Please provide a table with the precise values and some statistics.

Table S2 has been added.

The precise values from which the removal efficiencies in Fig. 6 were determined are listed in Table S2.

"humidified significant" Grammar.

Corrected.



"RH-dependent breakthrough". During zeroing, dry air is added and some of it travels through the denuder; does the denuder require some conditioning then after the switch back to ambient air sampling?

Zero air is never flowing back through the denuder to avoid exposing it (and fittings) to hot air. The valves are switched during zeroing to guarantee that excess zero air leaves towards ambient or through the non-denuder oven.

pg 13 line 9. ">95%. Please give precise values. Since NO<sub>x</sub> is usually the major component of NO<sub>y</sub>, the partial and variable (as a function of RH) transmission of NO<sub>x</sub> introduces a major bias when quantifying aerosol nitrate.

See Table S2.

pg 13 line 12. Why dry nitrogen (if the behaviour is different at high RH)? Is this really equivalent to 1 month of sampling ambient air? How was  $2.30 \times 10^{17}$  molecules derived at?

Dry nitrogen is the dilution gas of the iPN cylinder. The number of molecules deposited was calculated from the flow of iPN, the time of exposure and the cylinder mixing ratio.

pg 13 line 20 " $2.55 \times 10^{15}$ " what are the units here?

It is a number of molecules: We write:

During this experiment,  $2.55 \times 10^{15}$  molecules of NO<sub>x</sub> desorbed from the denuder, indicating that the major fraction of iPN molecules remained stored on the denuder surface upon humidification.

pg 13 line 23 "After loading the denuder with 5 sccm from a 0.831 ppm NO<sub>2</sub> gas bottle for 4.8 days" NO<sub>2</sub> cylinders usually co-emit HONO, HNO<sub>3</sub> and NO. Was this considered?

No, impurities in the NO<sub>2</sub> cylinder were not considered, as NO<sub>2</sub> is presumably still the dominant component. In a separate experiment we also observed that deposited HNO<sub>3</sub> is not re-released as NO<sub>x</sub> upon humidification. In our discussion we speculate that HONO might be an intermediate in the formation of the released NO.

pg 13 line 24 "(a total of  $7.60 \times 10^{17}$  molecules deposited)" How this value determined?

An explanation has been added.

[...], derived from the flow rate, the exposure time and the gas bottle mixing ratio)

pg 15 line 14 sections 4.1 and 4.2 are not convincing since there is no independent measure of what to expect for pNit.

These sections illustrate the first deployment of the instrument and are not intended to provide validation of e.g. the pNit measurement by inter-comparison. In contrast, the case study in Sect. 4.1 serves to demonstrate that humidity related interferences in the pNit channel are likely to be a source of bias under field conditions. This information is important to those striving to measure pNit with similar denuders. See also reply to major comment (2) (c).

pg 16 line 10 Does the AMS quantify supermicron particles at all? A citation is needed.

A citation has been provided:

(Drewnick et al., 2005).

pg 17 line 18 "> 90% transmission for ammonium nitrate". Is this statement justified when the transmission varies with size as shown in Figure 5?

This is why we give a size range in this sentence. Between ~40 and 400 nm the transmission is consistently above 90 %.

pg 21 line 45. The accepted paper should be cited.

pg 22 line 28. The accepted paper should be cited.

pg 23 line 13 The paper by Womack et al. (2017) has been accepted and should be cited and not its discussion paper.

Corrected for all three papers.

pg 24 Figure 1. Please add more detail such as dimensions; for example, indicate the diameter of the critical orifice and air pressure, and show l and d.

The two orifices have diameters of  $\approx 0.05$  mm.

This information has been added to the caption.

Figure 1 shows that ambient air is drawn in through two valves ("V")? Are these described anywhere? How much of a pressure drop do they give? What is the internal surface made of (Teflon?)?

Information on the valves has been added. See above.

An electronic, PTFE 3-way valve (Neptune Research, Inc., type 648T032, diameter 4.4 cm, height 5.2 cm, orifice diameter 4 mm) under software control switches between the two heated inlets, one of which is equipped with a denuder. Memory effects through the employment of this valve were not observed. Bypassing the valve under normal sampling conditions led to an 0.6 torr pressure change.

In Figure 1, "1/2 in PFA" should be in metric units; indicate if this is outer or inner diameter and how long this section is.

Corrected.

In Figure 1, what does the green line represent? A chamber wall?

That was indeed a left-over from a previous diagram. The line has been removed.

The Figure is inconsistent with the text as it shows a TD oven at 850 C which is roughly the same length as the denuder; in the text, the section actually heated is described as rather short or 3 cm long, and the denuder length is stated at 10 cm.

Dimensions of the heated inlets parts are now included in the figure. A note has been added in the caption that the figure is not to scale.

pg 25 Figure 2. The PAN and iPN thermograms are inconsistent with literature. The caption should state the level of O<sub>3</sub> present for the NH<sub>3</sub> experiment.

Literature inconsistencies are discussed above. O<sub>3</sub> level was added:

[...] NH<sub>3</sub> (without added O<sub>3</sub>).

pg 26 Figure 3 is not essential to this paper and probably should be in the supplemental.

The linear correlation between added O<sub>3</sub> and the extent of the NH<sub>3</sub> interference is an important finding and one of the main novelties in the NH<sub>3</sub> section, compared to the study of Womack et al. (2017). Therefore, we would preferably keep the figure in the main manuscript.

pg 28 Figure 5. Please specify the type of aerosol diameter (geometric vs. mobility). State value of key parameters (flow rate, denuder diameter). Correct inconsistency between PLC and PCL.

Figure and caption amended accordingly.

An aerosol flow of 3.3 slm was directed through the denuder (diameter 3 cm, see Sect. 2.4) and subsequently a DMA sampled 0.3 slm from the stream exiting the denuder.

pg 29 Figure 6. Please zoom in to ~60% to 100% for NO and to 95% to 100% for the other gases. Often, NO and NO<sub>2</sub> are the largest components of NO<sub>y</sub>. How accurate is the measurement of NO<sub>z</sub> species if ~5% of NO<sub>2</sub> and ~35% of NO break through the denuder? How variable are the numbers shown in Figure 6 (add error bars)?

The Figure has been re/drawn with error bars and an inset. The direct breakthrough of NO and NO<sub>2</sub> at zero-humidity is indeed just as problematic as the humidity induced re-release of NO in zero air. See above for discussion of the usability of pNit measurements (major comment (2) (c)). See new table S2 for precise values and variability metrics.

pg 30 Figures 7. What do the blue shades represent and why does the RH change (state in caption). As stated in the comments above, I am not convinced this experiment provides relevant information for an ambient air measurement (conc. are simply too high).

The caption has been extended. We have replied above to the comment on the high mixing ratios used.

The blue shaded area signifies the period in which the inlet oven was heated to 850 °C. Changes in RH are achieved by flowing parts of the zero air stream through deionized water.

O<sub>3</sub> addition was switched off during the blue shaded period.

pg 31 The presentation of Figure 8 is unclear.

How this experiment conducted?

Is synthetic air equal to zero air (and why is it humid then)?

In panel (a), why is there a "bump" at 9:50?

In panel (b), what does the derivative mean to the reader? What time?

Why are there lines for different RH?

The caption has been extended. The discontinuity ("bump") during the drying phase is caused by the presence of different adsorption sites and/or phase transitions on the denuder surface (as discussed in Sect. 3.3.2). The derivative was calculated in order to locate the position of this feature. Several RHs were plotted to demonstrate, that the discontinuity is slightly shifted to higher RH when starting the drying from a higher RH.

a) RH of humidified synthetic zero air after passing through the denuder. The initial RH was determined by bypassing the denuder before and after the experiment. Zero air was humidified by flowing a fraction of the stream through deionized water stored in a glass vessel. The time at which the experiment was conducted is given on the x-axis. Until ca. 09:35 UTC air with constant humidity (RH ca. 68%) was sent through the denuder. Behind the denuder, the measured humidity increased with a delay. Afterwards the denuder was exposed to dry zero air. b) Derivative of the measured RH during the drying period. The step during the drying phase occurs in a higher RH area, when starting the drying from a larger RH value.

pg 32 Figure 9. Properly cite Kim et al. in the bibliography, and do not provide the full reference in the caption.

Corrected.

pg 33 Figure 10a. Is the slope correct? There seem to be many points above the line. Is the slope affected by outliers? In any case, it's great that NO<sub>x</sub> data agree, but since the focus of this paper is mainly on measurement of NO<sub>y</sub>, NO<sub>z</sub> and particle nitrate, a more relevant plot would be TD-CRDS NO<sub>y</sub> vs. CLD NO<sub>y</sub>, TD-CRDS NO<sub>z</sub> vs. NO<sub>z</sub> measured by other techniques, as well TD-CRDS nitrate vs PILS or MARGA nitrate.

We have added a histogram of the NO<sub>x</sub> data points as Fig. S6. The histogram shows that 92 % of all data points are below 5 ppbv. These data points determine the slope of the overall correlation, explaining the visual misinterpretation caused by the relatively few data points between 10 and 25 ppbv. No other NO<sub>z</sub> or NO<sub>y</sub> measurements with which to compare were available during AQABA.

pg 33 Figure 10b I am not sure the OPC data add anything of value here since the nitrate fraction could be changing.

The OPC data set was added to exclude the possibility that the short term fluctuations in pNit were caused by coarse mode nitrates, undetected by the AMS, despite the non-nitrate-specific nature of the OPC signal.

Supplemental:

Figure S1. Please provide the mechanism used in the box model.

The reaction scheme has been added as table S1.

Figure S2, caption. "total uncertainty of the TD-CRDS measurements" - what is meant by this?

The caption has been refined.

Error bars represent the ~~total~~ measurement uncertainty of the TD-CRDS measurements (see Sect. 2.2).

Figure S2D is inconsistent with Figure 2 which shows the entire TD profile of iPN overlapping with that of HNO<sub>3</sub> - which is not observed in Figure S2D under any condition.

The iPN thermogram has been re-measured. See above.

Figure S3. A strange and confusing way to present data.

The figure helps to explain the reason why addition of O<sub>3</sub> to convert NO to NO<sub>2</sub> removes the need for complex data correction.

The simulations consider oxidation of NO<sub>2</sub> by O<sub>3</sub> to form NO<sub>3</sub> and subsequent formation of N<sub>2</sub>O<sub>5</sub>. Were NO<sub>3</sub> and N<sub>2</sub>O<sub>5</sub> sinks been considered? Please provide the full mechanism.

See new table S1.

## References

- Barker, J. R., Benson, S. W., Mendenhall, G. D., and Goldern, D. M.: Measurements of rate constants of importance in smog, Rep. PB-274530, Natl. Tech. Inf. Serv., Springfield, Va., 1977.
- Baulch, D. L., Duxbury, J., Grant, S. J., and Montague, D. C.: Evaluated kinetic data for high temperature reactions. Volume 4 Homogeneous gas phase reactions of halogen- and cyanide- containing species, J. Phys. Chem. Ref. Data, 10, 1981.
- Bridier, I., Caralp, F., Loirat, H., Lesclaux, R., Veyret, B., Becker, K. H., Reimer, A., and Zabel, F.: Kinetic and Theoretical-studies of the Reactions  $\text{CH}_3\text{C}(\text{O})\text{O}_2 + \text{NO}_2 + \text{M} \rightleftharpoons \text{CH}_3\text{C}(\text{O})\text{NO}_2 + \text{M}$  between 248 K and 393 K and Between 30-torr and 760-torr, Journal of Physical Chemistry, 95, 3594-3600, 1991.
- Day, D. A., Wooldridge, P. J., Dillon, M. B., Thornton, J. A., and Cohen, R. C.: A thermal dissociation laser-induced fluorescence instrument for in situ detection of  $\text{NO}_2$ , peroxy nitrates, alkyl nitrates, and  $\text{HNO}_3$ , J. Geophys. Res. -Atmos., 107, doi:10.1029/2001jd000779, 2002.
- Drewnick, F., Hings, S. S., DeCarlo, P., Jayne, J. T., Gonin, M., Fuhrer, K., Weimer, S., Jimenez, J. L., Demerjian, K. L., Borrmann, S., and Worsnop, D. R.: A new time-of-flight aerosol mass spectrometer (TOF-AMS) - Instrument description and first field deployment, Aerosol Science and Technology, 39, 637-658, 10.1080/02786820500182040, 2005.
- Glänzer, K., and Troe, J.: Thermal Decomposition of Nitrocompounds in Shock Waves. IV: Decomposition of Nitric Acid, Berichte der Bunsengesellschaft für physikalische Chemie, 78, 71-76, 10.1002/bbpc.19740780112, 1974.
- IUPAC: Task Group on Atmospheric Chemical Kinetic Data Evaluation, (Ammann, M., Cox, R.A., Crowley, J.N., Herrmann, H., Jenkin, M.E., McNeill, V.F., Mellouki, A., Rossi, M. J., Troe, J. and Wallington, T. J.) <http://iupac.pole-ether.fr/index.html>, 2019.
- Sobanski, N., Schuladen, J., Schuster, G., Lelieveld, J., and Crowley, J. N.: A five-channel cavity ring-down spectrometer for the detection of  $\text{NO}_2$ ,  $\text{NO}_3$ ,  $\text{N}_2\text{O}_5$ , total peroxy nitrates and total alkyl nitrates, Atmos. Meas. Tech., 9, 5103-5118, 10.5194/amt-9-5103-2016, 2016.
- Thieser, J., Schuster, G., Phillips, G. J., Reiffs, A., Parchatka, U., Pöhler, D., Lelieveld, J., and Crowley, J. N.: A two-channel, thermal dissociation cavity-ringdown spectrometer for the detection of ambient  $\text{NO}_2$ ,  $\text{RO}_2\text{NO}_2$  and  $\text{RONO}_2$ , Atmos. Meas. Tech., 9, 553-576, 10.5194/amt-9-553-2016, 2016.
- Tsang, W., and Herron, J. T.: Chemical kinetic data base for propellant combustion. I. Reactions involving  $\text{NO}$ ,  $\text{NO}_2$ ,  $\text{HNO}$ ,  $\text{HNO}_2$ ,  $\text{HCN}$  and  $\text{N}_2\text{O}$ , JPCRD, 20, 609-663, 1991.
- Wild, R. J., Edwards, P. M., Dube, W. P., Baumann, K., Edgerton, E. S., Quinn, P. K., Roberts, J. M., Rollins, A. W., Veres, P. R., Warneke, C., Williams, E. J., Yuan, B., and Brown, S. S.: A measurement of total reactive nitrogen,  $\text{NO}_y$ , together with  $\text{NO}_2$ ,  $\text{NO}$ , and  $\text{O}_3$  via cavity ring-down spectroscopy, Environmental Science & Technology, 48, 9609-9615, doi:10.1021/es501896w, 2014.



Womack, C. C., Neuman, J. A., Veres, P. R., Eilerman, S. J., Brock, C. A., Decker, Z. C. J., Zarzana, K. J., Dube, W. P., Wild, R. J., Wooldridge, P. J., Cohen, R. C., and Brown, S. S.: Evaluation of the accuracy of thermal dissociation CRDS and LIF techniques for atmospheric measurement of reactive nitrogen species, *Atmospheric Measurement Techniques*, 10, 1911-1926, 10.5194/amt-10-1911-2017, 2017.
